# Supplementary material for: Antigen density and applied force control enrichment of nanobody-expressing yeast cells in microfluidics
Source: Royal Society of Chemistry journal article supplement (doi:10.1039/d4lc00011k), 2024-01-01

Negative Yeast

Positive Yeast

Capture Efficiency  $y$

Adhesion  
Bright field

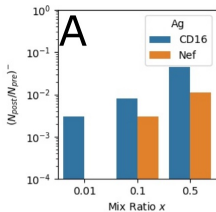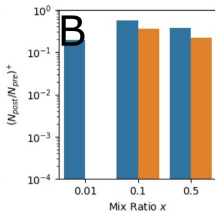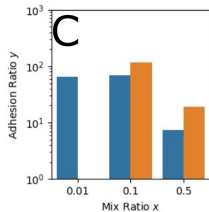

Adhesion  
Fluorescence

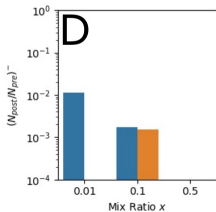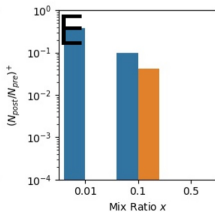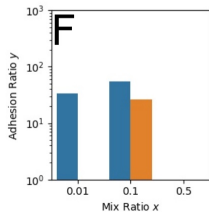

Supplement: d4lc00011k5.pdf [file d4lc00011k5.pdf]
