# Supplementary figures and images for: Antigen density and applied force control enrichment of nanobody-expressing yeast cells in microfluidics
Source: Royal Society of Chemistry journal article supplement (doi:10.1039/d4lc00011k), 2024-01-01

**Raw Image**

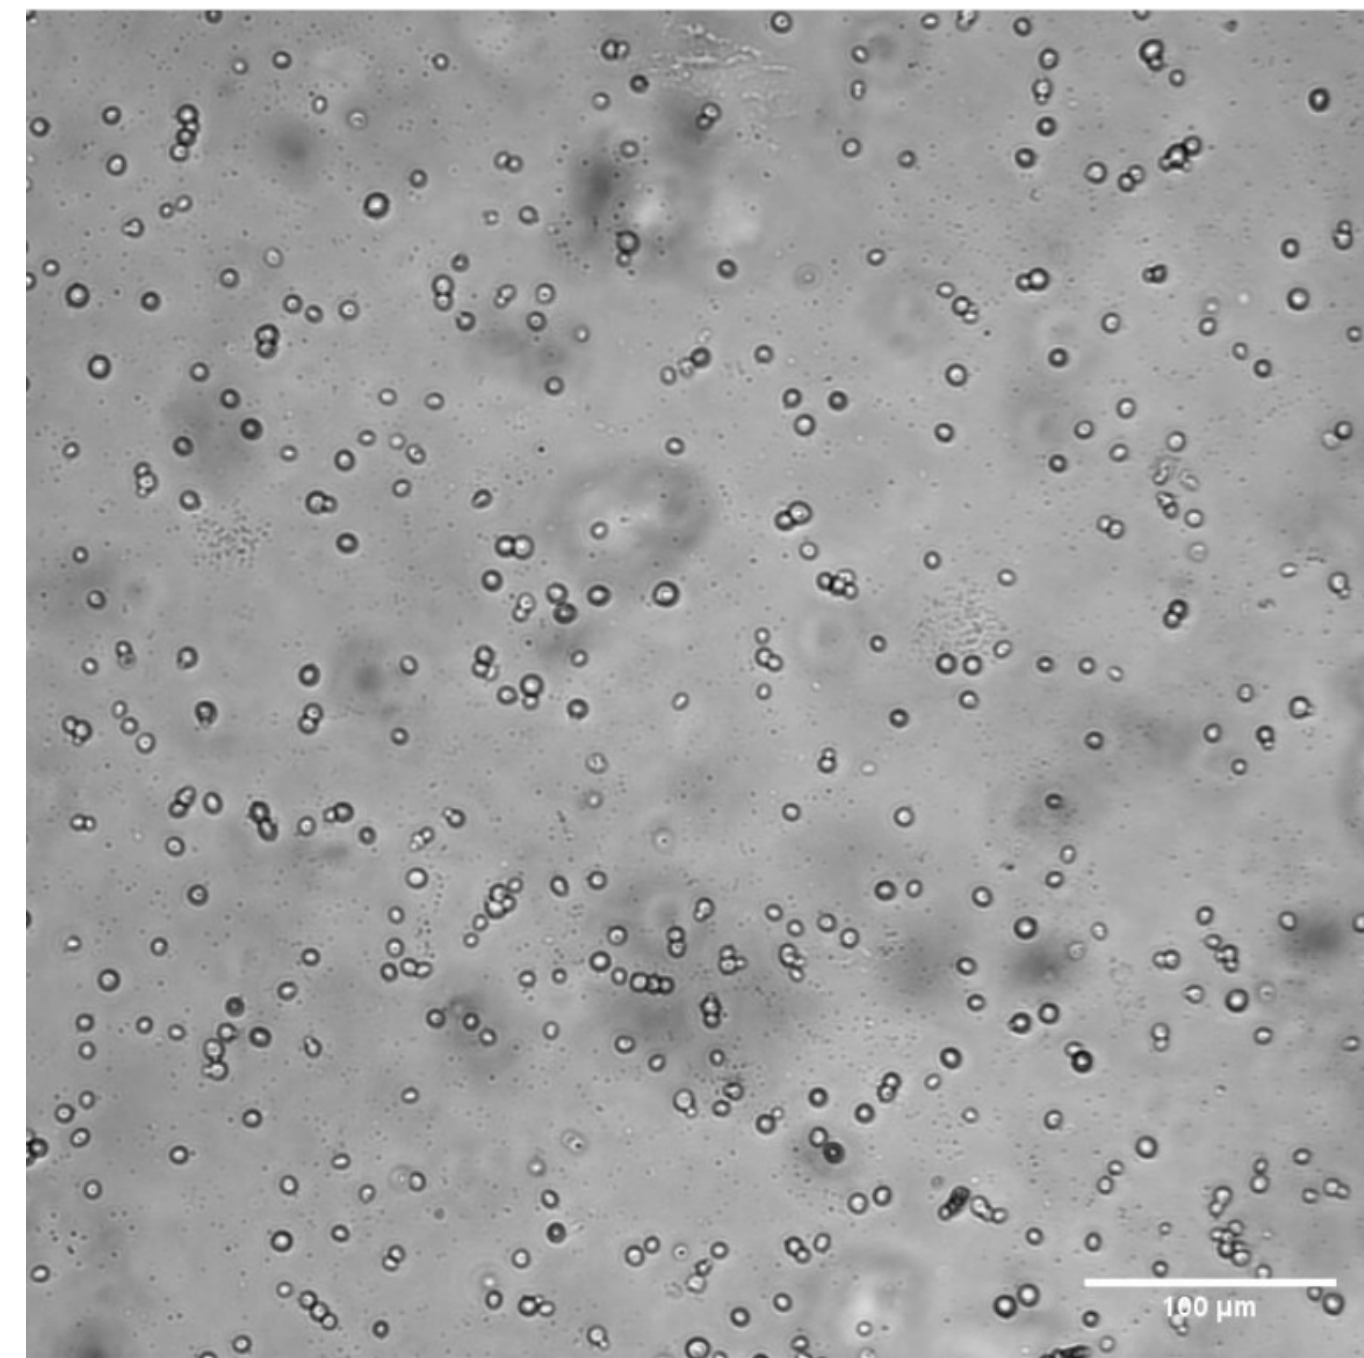

**Threshold**

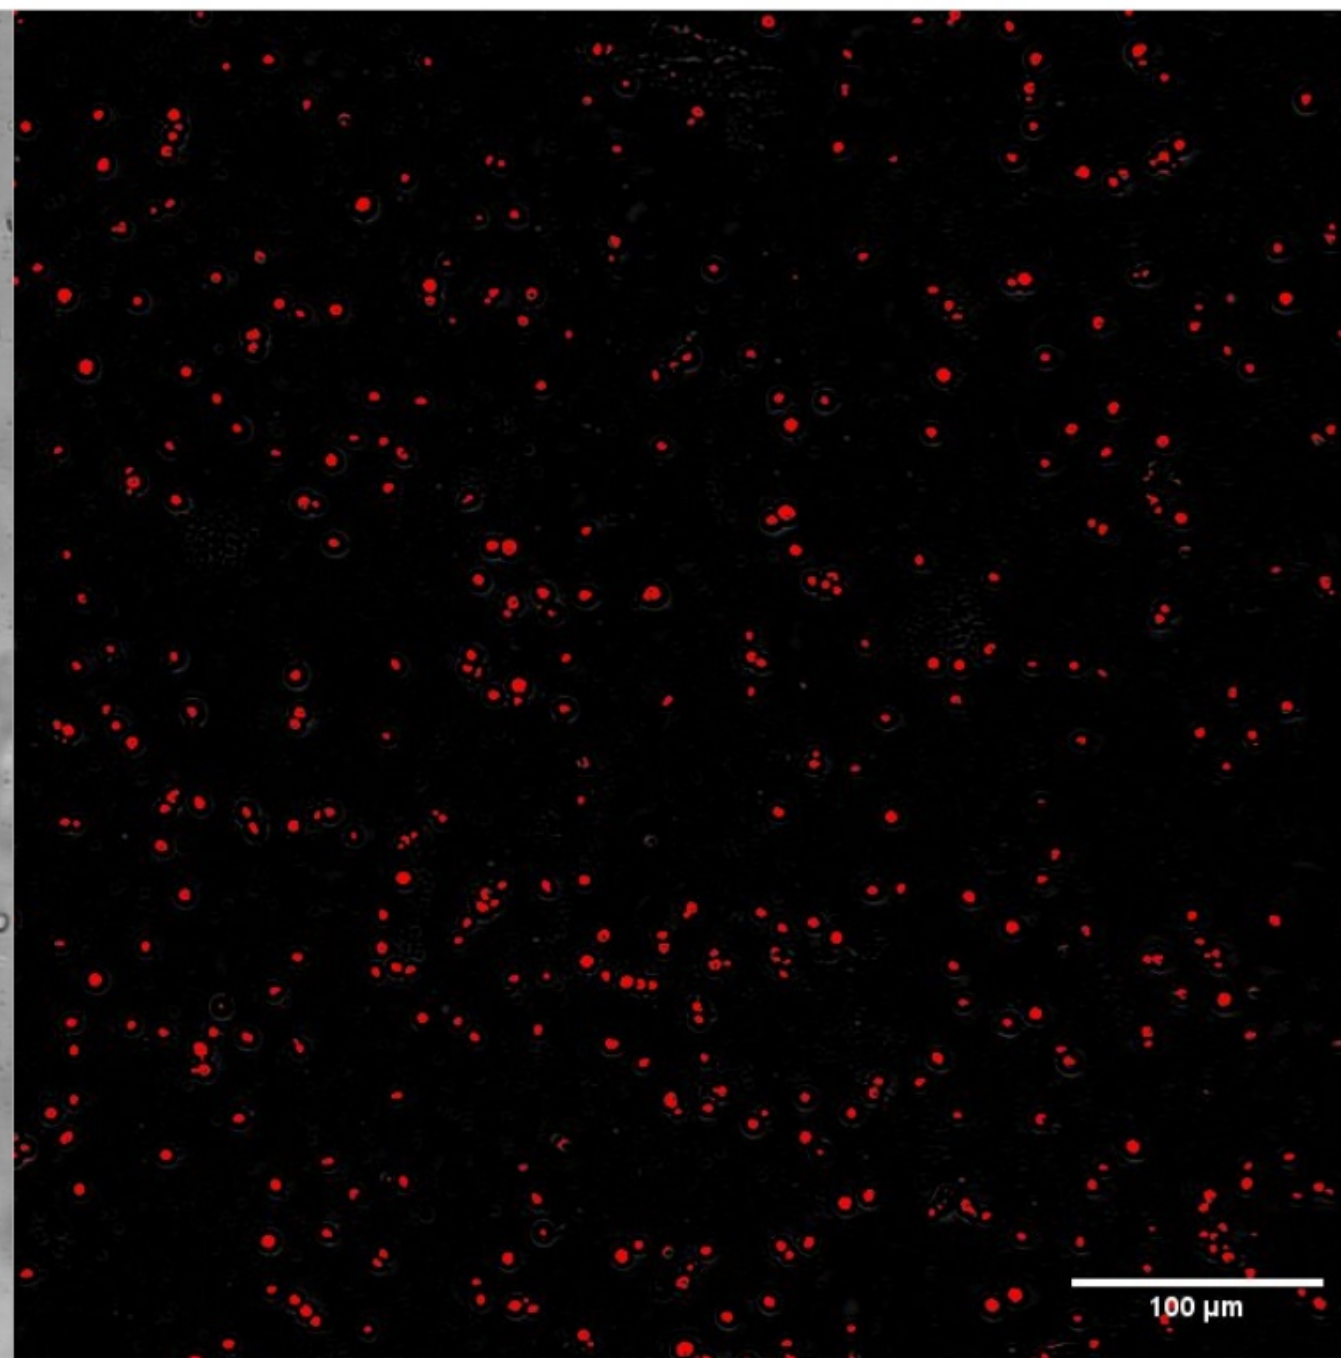

Supplement: d4lc00011k2.pdf [file d4lc00011k2.pdf]

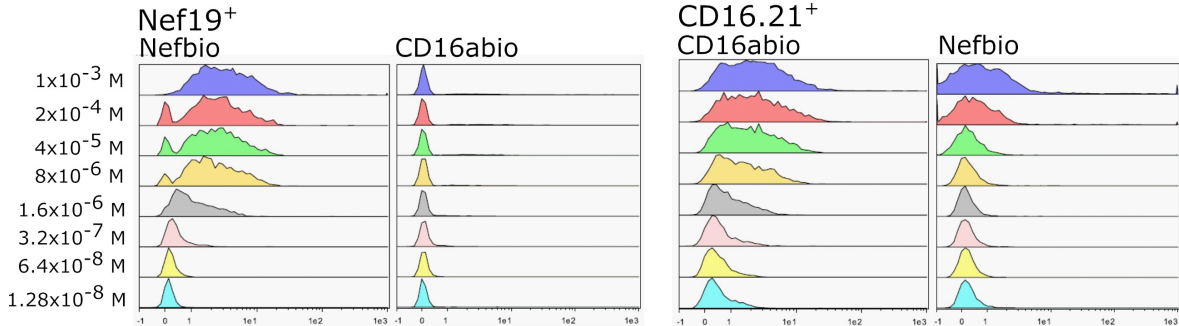

Supplement: d4lc00011k3.pdf [file d4lc00011k3.pdf]

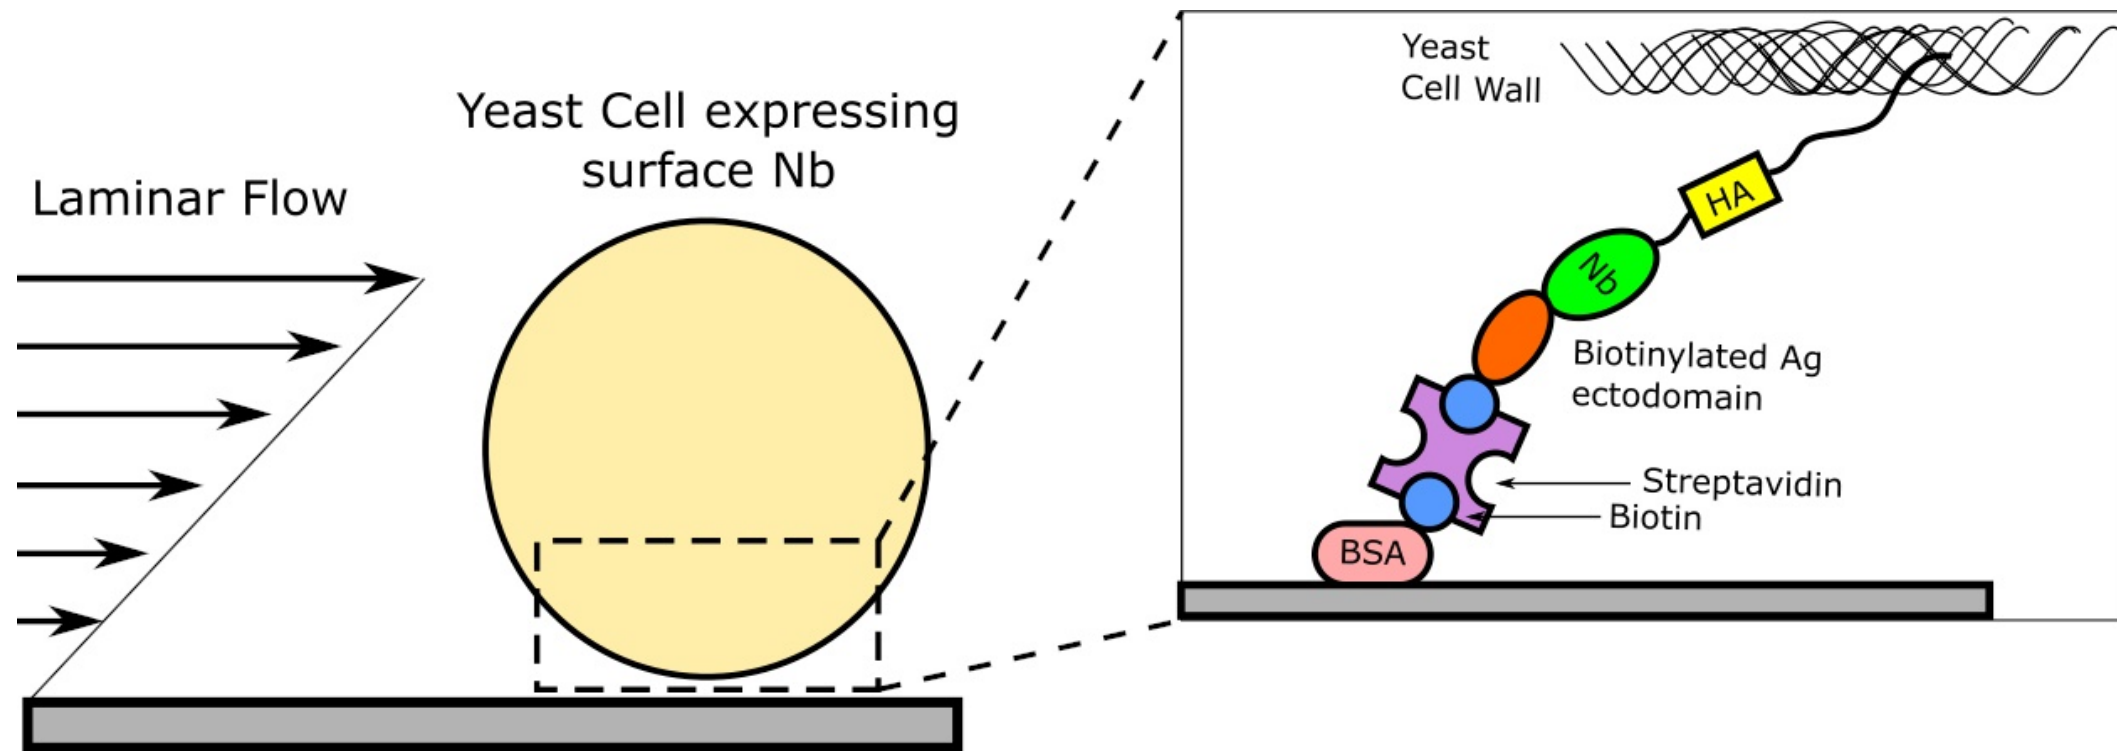

Supplement: d4lc00011k4.pdf [file d4lc00011k4.pdf]
